# Supplementary material for: A phase I trial of NK-92 cells for refractory hematological malignancies relapsing after autologous hematopoietic cell transplantation shows safety and evidence of efficacy
Source: PubMed Central journal article supplement (PMC5687687; doi:10.18632/oncotarget.19204), 2017-07-12
Supplement: oncotarget-08-89256-s001.pdf [file oncotarget-08-89256-s001.pdf]

## A phase I trial of NK-92 cells for refractory hematological malignancies relapsing after autologous hematopoietic cell transplantation shows safety and evidence of efficacy

### SUPPLEMENTARY MATERIALS

**Supplementary Table 1: Time from relapse post AHCT to initiation of NK-92 trial and survival**

| Patient Number | Duration of response post AHCT (months) | Time from AHCT to NK92 (months) | Time from Relapse to NK92 (months) | Survival from trial enrolment (months) |
|----------------|-----------------------------------------|---------------------------------|------------------------------------|----------------------------------------|
| 01             | 33.7                                    | 69.7                            | 36.0                               | 72.1                                   |
| 02             | 34.5                                    | 37.7                            | 3.2                                | 24.7                                   |
| 03             | 9.5                                     | 52.2                            | 42.8                               | 127.9                                  |
| 04             | 4.1                                     | 6.0                             | 1.9                                | 7.2                                    |
| 05             | 18.8                                    | 68.2                            | 49.4                               | 12.1                                   |
| 06             | 20.6                                    | 30.5                            | 9.9                                | 17.6                                   |
| 07             | 64.1                                    | 66.7                            | 2.6                                | 36.5                                   |
| 08             | 3.9                                     | 126.0                           | 122.0                              | 1.1                                    |
| 09             | 18.7                                    | 89.8                            | 71.1                               | 3.0                                    |
| 10             | 25.9                                    | 33.7                            | 7.8                                | 44.1                                   |
| 11             | 23.0                                    | 49.7                            | 26.7                               | 37.0                                   |
| 12             | 16.1                                    | 55.6                            | 39.5                               | 26.4                                   |

**Supplementary Table 2: Quality control testing on NK-92 on patient 01 first cycle**

| Parameter                           | Result                                       |
|-------------------------------------|----------------------------------------------|
| Gram stain                          | negative                                     |
| Mycoplasma                          | negative                                     |
| Endotoxin                           | negative                                     |
| Flow cytometry (positive)           | CD 2, 7, 11A, 28, 45, 54, 56                 |
| Flow cytometry (negative)           | CD 1A, 3, 4, 8, 10, 14, 16, 20, 23, 34       |
| Cytotoxicity (% lysis at E:T ratio) | 5:1 (32 +/-3), 10:1(39 +/-2), 20:1 (49 +/-5) |

**Supplementary Table 3: Summary of mixed lymphocyte reaction assays of patient lymphocytes mixed with NK-92**

| <b>Patient#</b> | <b>MLR tested</b> | <b>Number of tests*</b> | <b>MLR results</b> |
|-----------------|-------------------|-------------------------|--------------------|
| 01              | Yes               | 1                       | Negative           |
| 02              | Yes               | 2                       | Negative           |
| 03              | Yes               | 5                       | Negative           |
| 04              | Yes               | 1                       | Negative           |
| 05              | Yes               | 3                       | Negative           |
| 06              | Yes               | 6                       | Negative           |
| 07              | Yes               | 4                       | Negative           |
| 08              | No                | N/A                     | N/A                |
| 09              | Yes               | 2                       | Negative           |
| 10              | Yes               | 6                       | Negative           |
| 11              | Yes               | 5                       | Negative           |
| 12              | No                | N/A                     | N/A                |

\*Patients had MLR testing from pre-cycle 2, up to post-treatment in some cases.
